# Supplementary material for: Rickettsia parkeri hijacks tick hemocytes to manipulate cellular and humoral transcriptional responses
Source: PubMed Central journal article supplement (PMC9950277; doi:10.3389/fimmu.2023.1094326), 2023-02-10
Supplement: Presentation_1.pdf [file Presentation_1.pdf]

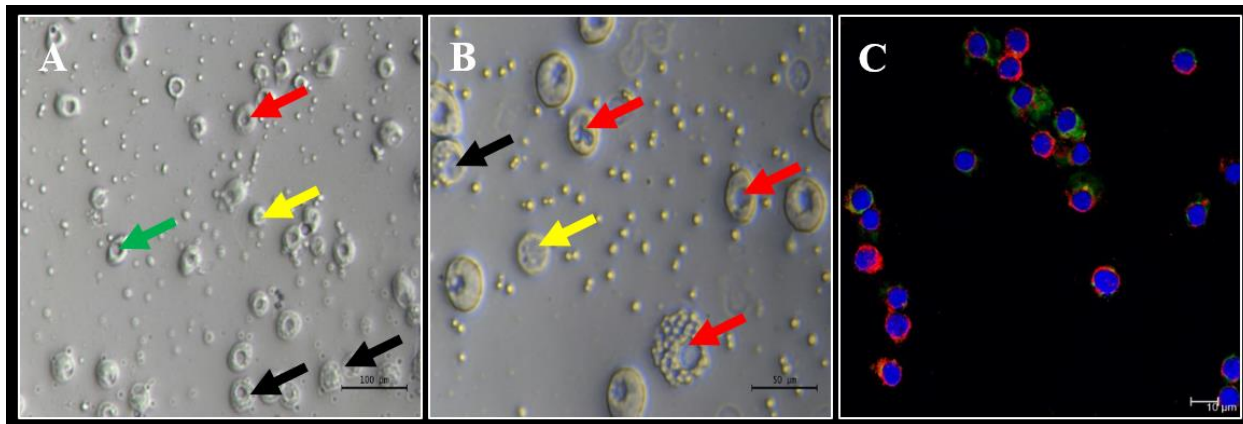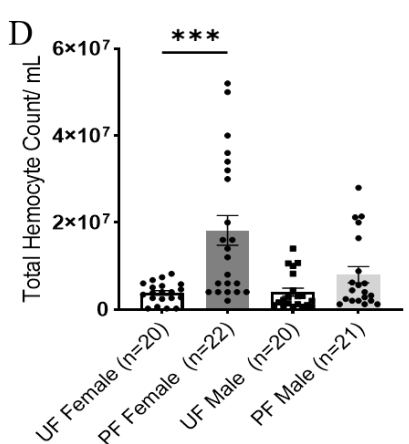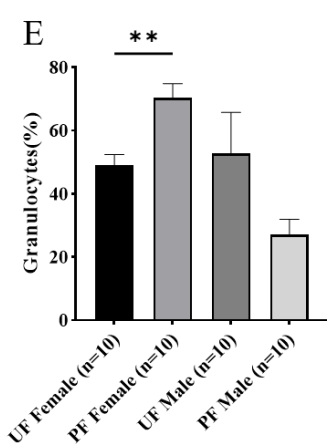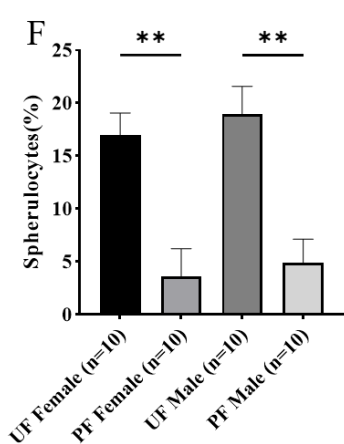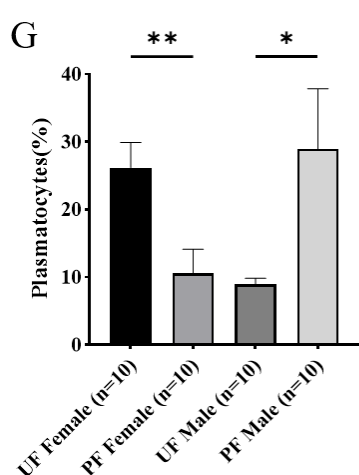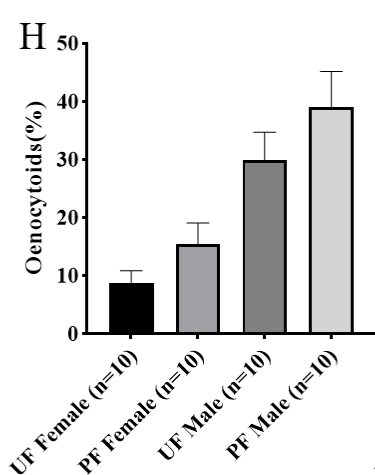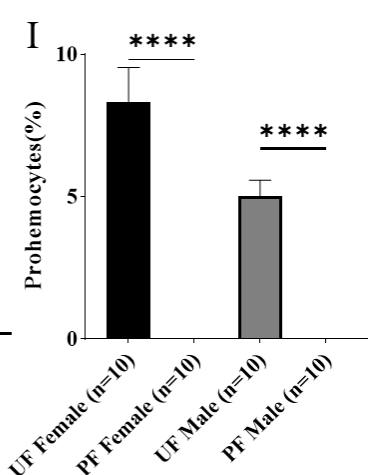

**Supplementary Figure S1A-C. Microscopic examination and immunostaining of hemolymph, and hemocyte populations within the tick.** Light microscopic examination of perfused hemolymph at (A) lower and (B) higher magnification showing multiple hemocyte populations. (C) Immunostaining of perfused hemocytes with WGA lectin (green), Vybrant CM-Dil (red), and Hoechst 33342 stains (blue). Scale bars as indicated. Hemolymph was perfused from unfed male and female ticks and the (D) total and (E-I) differential hemocyte populations compared between unfed and partially fed male and female ticks using an improved Neubeur chamber. Data were analyzed using unpaired t-tests in GraphPad Prism v8.4.1. \*P < 0.05, \*\*P < 0.01, \*\*\*P < 0.001, \*\*\*\*P < 0.0001. UF; unfed, PF; partially blood fed.

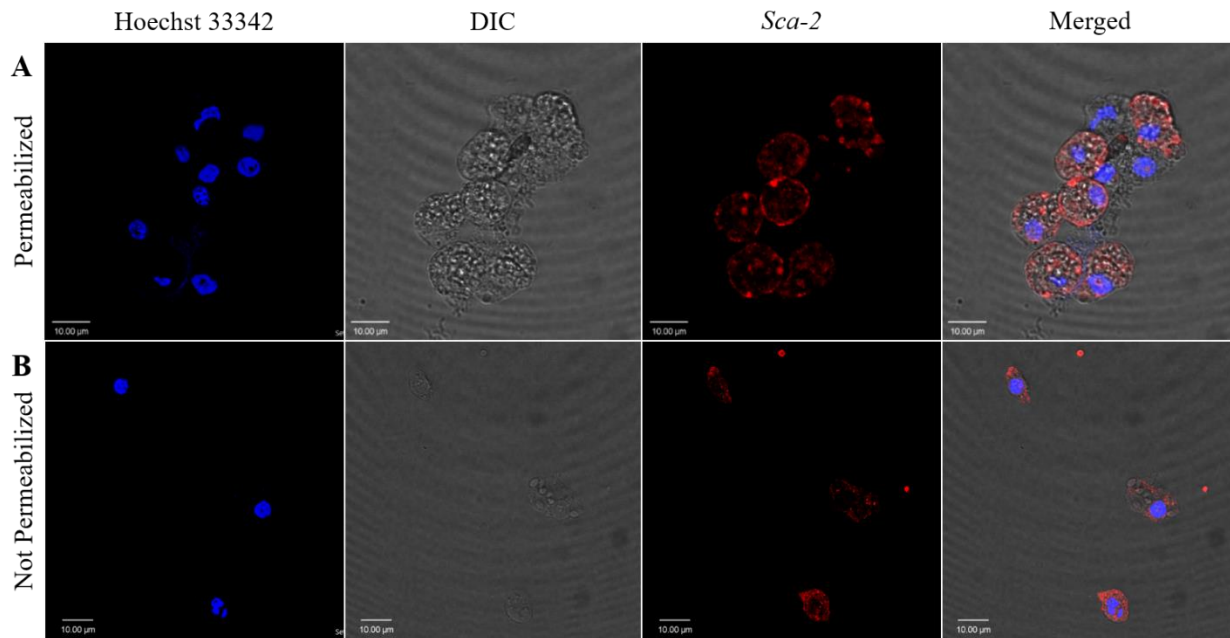

**Supplementary Figure S2A and B. Confocal images of phagocytic hemocytes infected with *Rickettsia parkeri*.** Representative confocal images of immunofluorescence staining for *R. parkeri* *Sca2* protein in hemolymph of *R. parkeri*-infected *Am. maculatum*. Hemocytes were either **(A)** permeabilized with Triton-X or **(B)** not permeabilized before incubation with *Sca2*-specific antibodies (red) and Hoechst 33342 (blue).

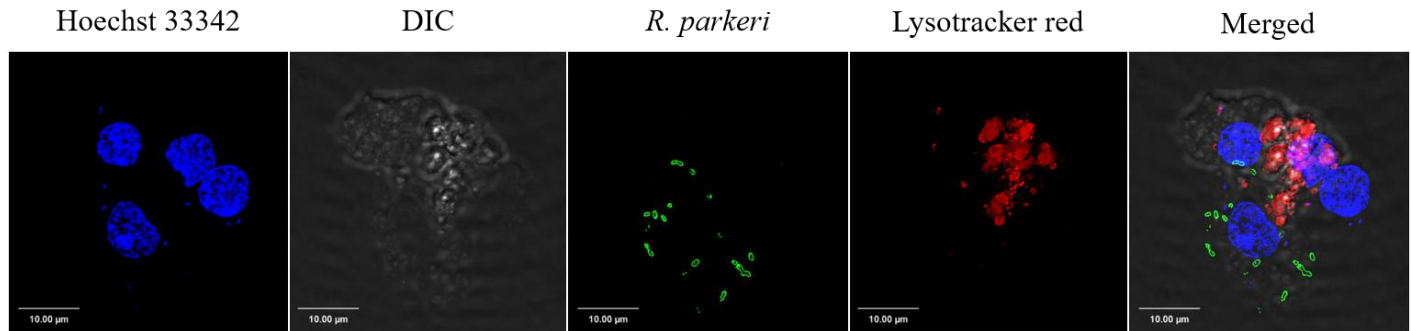

**Supplementary Figure S3. LysoTracker Red labeling of lysosomal compartments in ticks fed with *R. parkeri*.** Fluorescent microscopic images of hemocytes from *R. parkeri* infected ticks stained with LysoTracker Red (a lysosomal marker) 24 hours after infection. Hemocytes were incubated with primary antibodies against *R. parkeri* outer membrane protein (green) and Hoechst 33342 (blue). Scale bar = 10 µm.

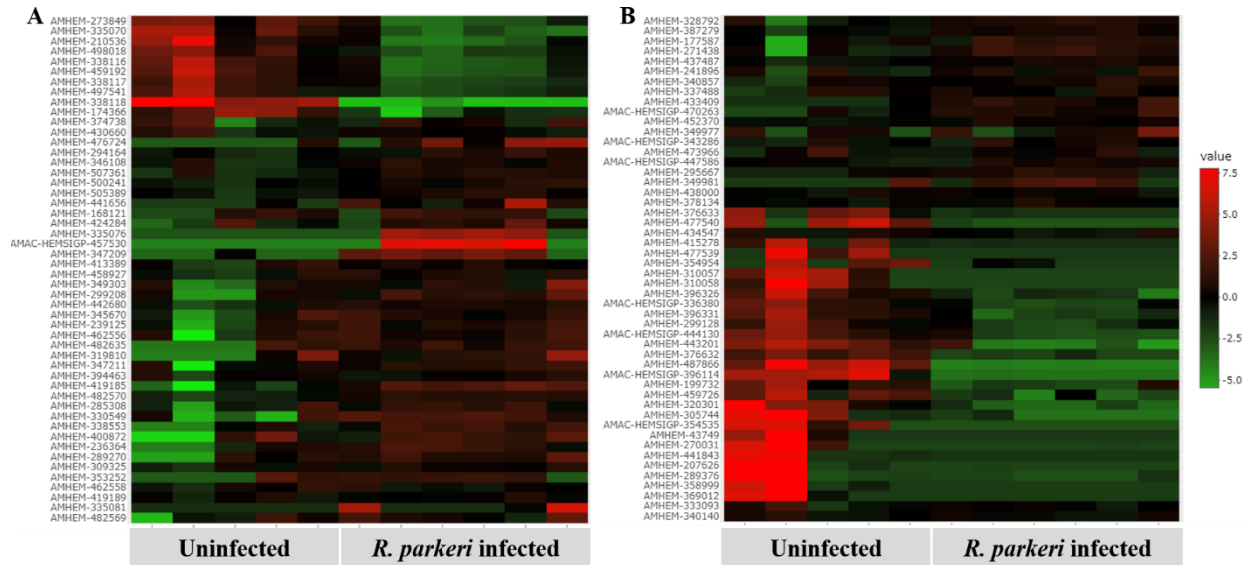

**Supplementary Figure S4A and B. Heatmaps of RNA-seq expression data showing hematopoietic and cellular function genes differentially regulated in *R. parkeri*-infected compared with uninfected hemocytes. Several of these transcripts include (A) transcriptional and (B) humoral regulators of hemocyte differentiation and maturation. The scale bar shows the log<sub>2</sub>fold expression value of the transcripts.**

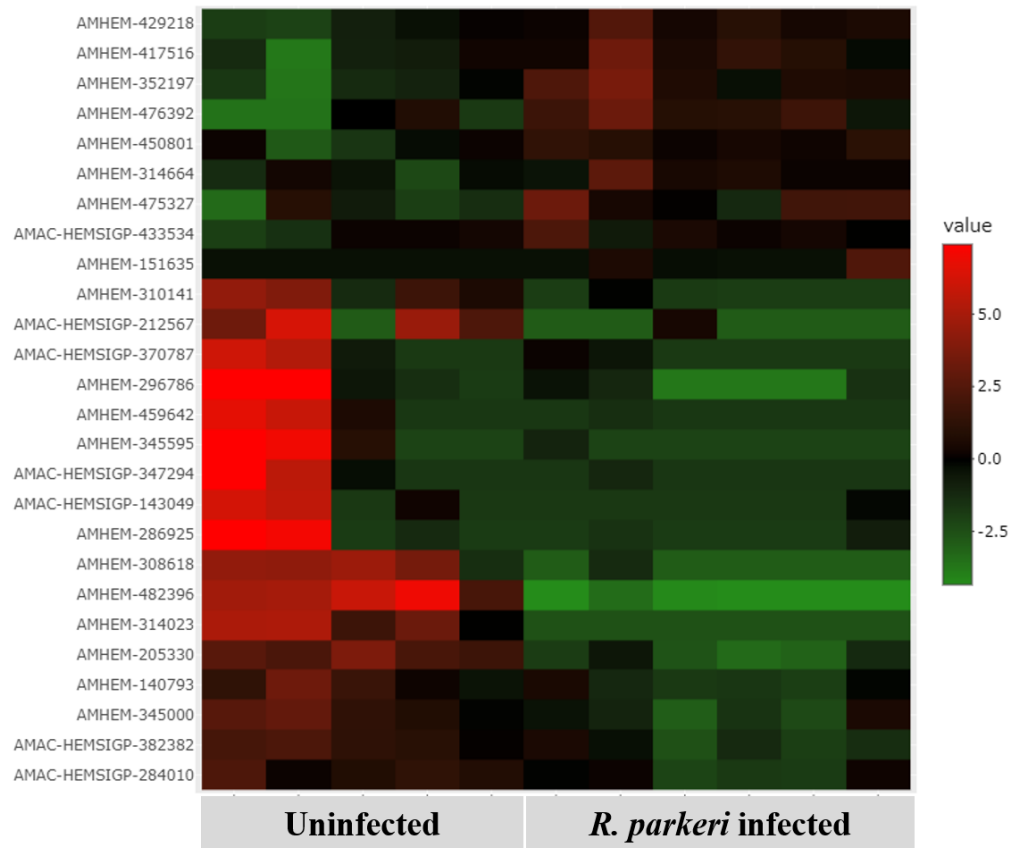

**Supplementary Figure S5. Heatmap of RNA-seq expression data showing differentially expressed transcripts in the toll-signaling pathway in *R. parkeri* infected and uninfected hemocytes.** Six of the nine Toll genes were identified including eight *PGRP* transcripts. Transcripts encoding *GGBP*, *tube*, and *pelle* were, however, not present. The scale bar to the right shows the log<sub>2</sub>fold expression value of the transcripts.

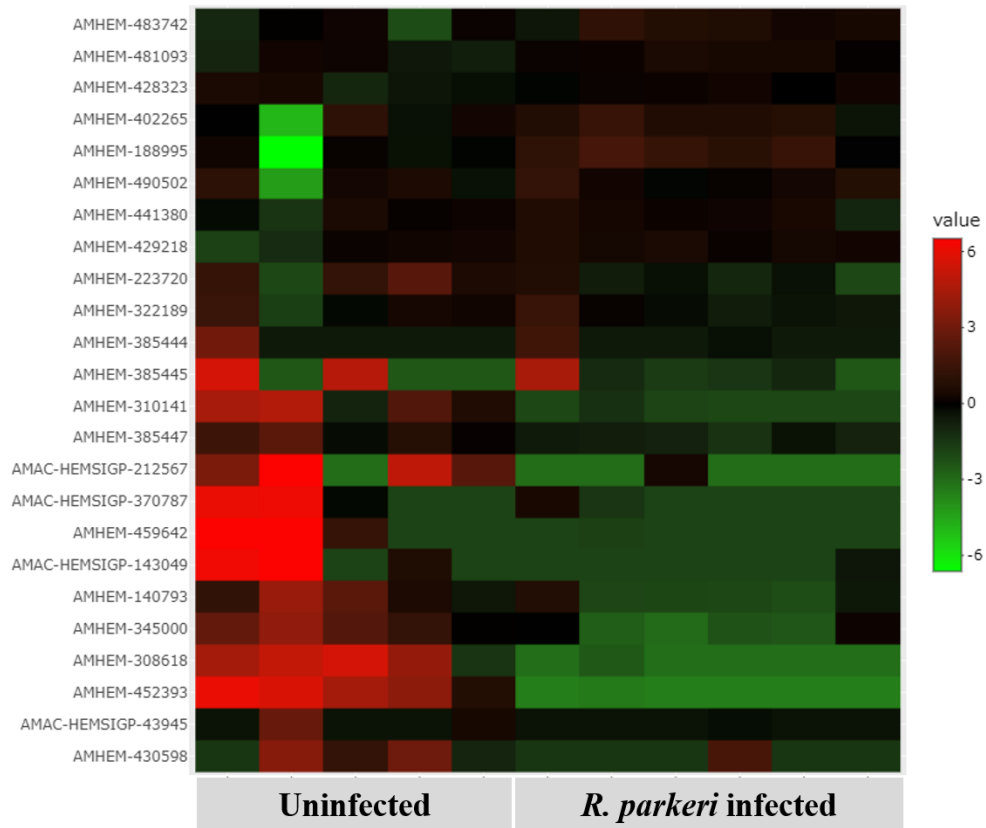

**Supplementary Figure S6. Heatmap of RNA-seq expression data showing differentially expressed transcripts in the IMD signaling pathway in *R. parkeri*-infected and uninfected hemocytes.** Sequences encoding *IMD*, Fas-associated via death domain (*FADD*), and death-related ced-3/Nedd2-like caspase (*DREDD*) genes were absent from our data. The scale bar to the right shows the log<sub>2</sub>fold expression value of the transcripts.
